# Supplementary material for: Impact of Four Rounds of Mass Drug Administration with Dihydroartemisinin–Piperaquine Implemented in Southern Province, Zambia
Source: PubMed Central journal article supplement (PMC7416977; doi:10.4269/ajtmh.19-0659), 2020-07-02
Supplement: tpmd190659.SD1.pdf [file tpmd190659.SD1.pdf]

Supplemental information

SI Table 1 Age-based dosing guidelines used for administering DHAP (Sigma Tau)

| Age         | Weight (kg) | DHAP (40/320mg)          |             |              |
|-------------|-------------|--------------------------|-------------|--------------|
|             | (kg)        | pill count per day       | mg<br>40    | mg<br>320    |
| 0–3 months  | <5          |                          |             |              |
| 3–12 months | 8           | 0.5                      | 2.50        | 20.00        |
| 1 year      | 10          | 1                        | 4.00        | 32.00        |
| 2           | 11          | 1                        | 3.64        | 29.09        |
| 3           | 15          | 1                        | 2.67        | 21.33        |
| 4           | 15          | 1                        | 2.67        | 21.33        |
| 5           | 18          | 1                        | 2.22        | 17.78        |
| 6           | 21          | 1                        | 1.90        | 15.24        |
| 7           | 23          | 1                        | 1.74        | 13.91        |
| 8           | 25          | 2                        | 3.20        | 25.60        |
| 9           | 28          | 2                        | 2.86        | 22.86        |
| 10          | 30          | 2                        | 2.67        | 21.33        |
| 11          | 35          | 2                        | 2.29        | 18.29        |
| 12          | 39          | 2                        | 2.05        | 16.41        |
| 13          | 45          | 2                        | 1.78        | 14.22        |
| 14          | 50          | 3                        | 2.40        | 19.20        |
| ≥15 years   | >50         | 3                        | <2.4        | <19.2        |
|             |             | <b>AVG<br/>mg/kg/day</b> | <b>2.57</b> | <b>20.57</b> |

**SI Table 2. Baseline characteristics of intervention and control households obtained from the parasite survey in April-May 2014**

| <b>Characteristic</b>                                                 | <b>MDA</b><br>(n = 1,047 children /<br>857 households)<br><b>(95 % CI)</b> | <b>fMDA</b><br>(n = 985 children /<br>850 households)<br><b>(95 % CI)</b> | <b>Control</b><br>(n = 976 children /<br>866 households)<br><b>(95 % CI)</b> |
|-----------------------------------------------------------------------|----------------------------------------------------------------------------|---------------------------------------------------------------------------|------------------------------------------------------------------------------|
| % Children by age included for parasite testing (in years)            |                                                                            |                                                                           |                                                                              |
| 3 month – 1 year                                                      | 12.70 (9.81 – 15.60)                                                       | 11.98 (9.98 – 14.03)                                                      | 12.81 (10.62 – 14.50)                                                        |
| 1                                                                     | 17.96 (15.89 – 20.02)                                                      | 17.87 (14.73 – 21.01)                                                     | 15.68 (13.56 – 17.79)                                                        |
| 2                                                                     | 15.85 (13.99 – 17.72)                                                      | 17.36 (15.18 – 19.54)                                                     | 17.52 (13.45 – 21.59)                                                        |
| 3                                                                     | 15.76 (13.44 – 18.07)                                                      | 17.46 (14.95 – 19.97)                                                     | 17.62 (15.29 – 19.96)                                                        |
| 4                                                                     | 17.67 (14.50 – 20.84)                                                      | 17.87 (15.28 – 20.45)                                                     | 19.06 (17.34 – 20.77)                                                        |
| 5                                                                     | 20.06 (17.23 – 22.88)                                                      | 17.46 (14.70 – 20.23)                                                     | 17.32 (14.08 – 20.55)                                                        |
| Sex of children included for parasite testing (% male)                | 48.14 (44.90 – 51.37)                                                      | 50.86 (46.44 – 55.28)                                                     | 52.25 (49.00 – 55.51)                                                        |
| % Children included for parasite testing by household wealth quintile |                                                                            |                                                                           |                                                                              |
| 1 - Poorest                                                           | 32.66 (23.63 – 41.70)                                                      | 21.73 (15.63 – 27.82)                                                     | 27.97 (20.05 – 35.89)                                                        |
| 2                                                                     | 19.10 (13.38 – 24.82)                                                      | 25.69 (20.78 – 30.59)                                                     | 19.06 (14.41 – 23.70)                                                        |
| 3                                                                     | 20.73 (15.77 – 25.68)                                                      | 19.29 (14.21 – 24.37)                                                     | 21.21 (16.16 – 26.26)                                                        |
| 4                                                                     | 17.86 (12.64 – 23.08)                                                      | 16.65 (12.20 – 21.10)                                                     | 18.95 (14.38 – 23.53)                                                        |
| 5 - Least poor                                                        | 9.65 (6.04 – 13.25)                                                        | 16.65 (9.41 – 23.89)                                                      | 12.81 (6.99 – 18.63)                                                         |

\*Significantly different with  $p < 0.05$
